# Supplementary material for: Sustained zinc release in cooperation with CaP scaffold promoted bone regeneration via directing stem cell fate and triggering a pro-healing immune stimuli
Source: PubMed Central journal article supplement (PMC8274038; doi:10.1186/s12951-021-00956-8), 2021-07-12
Supplement: 12951_2021_956_MOESM2_ESM.pdf [file 12951_2021_956_MOESM2_ESM.pdf]

**A**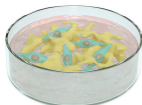**PLLA+PDPCs**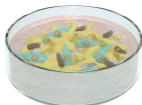**TCP+PDPCs**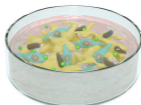**5%Zn+PDPCs**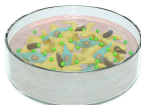**10%Zn+PDPCs****B**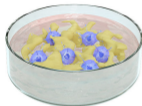**PLLA+Mφ**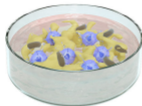**TCP+Mφ**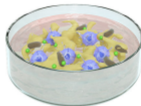**5%Zn+Mφ**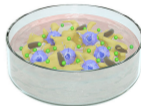**10%Zn+Mφ**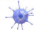**Macrophage (Mφ)**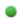**Zinc ion (Zn<sup>2+</sup>)**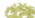**poly(L-lactic acid) (PLLA)**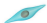**Periosteum-derived progenitor cells (PDPCs)**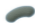**Tricalcium phosphate (TCP)**
