# Supplementary material for: Sustained zinc release in cooperation with CaP scaffold promoted bone regeneration via directing stem cell fate and triggering a pro-healing immune stimuli
Source: PubMed Central journal article supplement (PMC8274038; doi:10.1186/s12951-021-00956-8), 2021-07-12

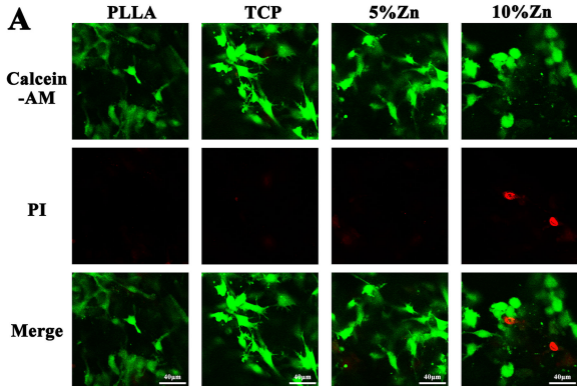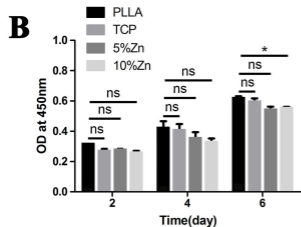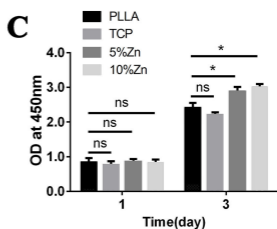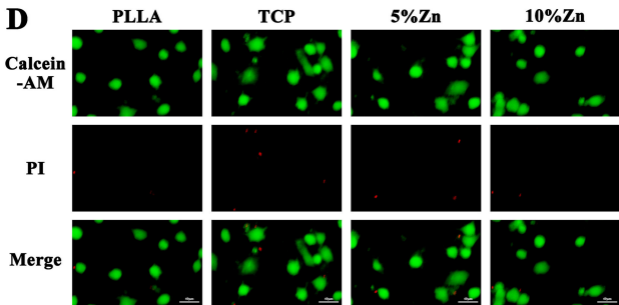

Supplement: 12951_2021_956_MOESM3_ESM.pdf [file 12951_2021_956_MOESM3_ESM.pdf]
